# Supplementary material
Source: PubMed Central journal article supplement (PMC4046215)
Supplement: Supp_Figure1.pdf [file Supp_Figure1.pdf]

## Supplementary Data

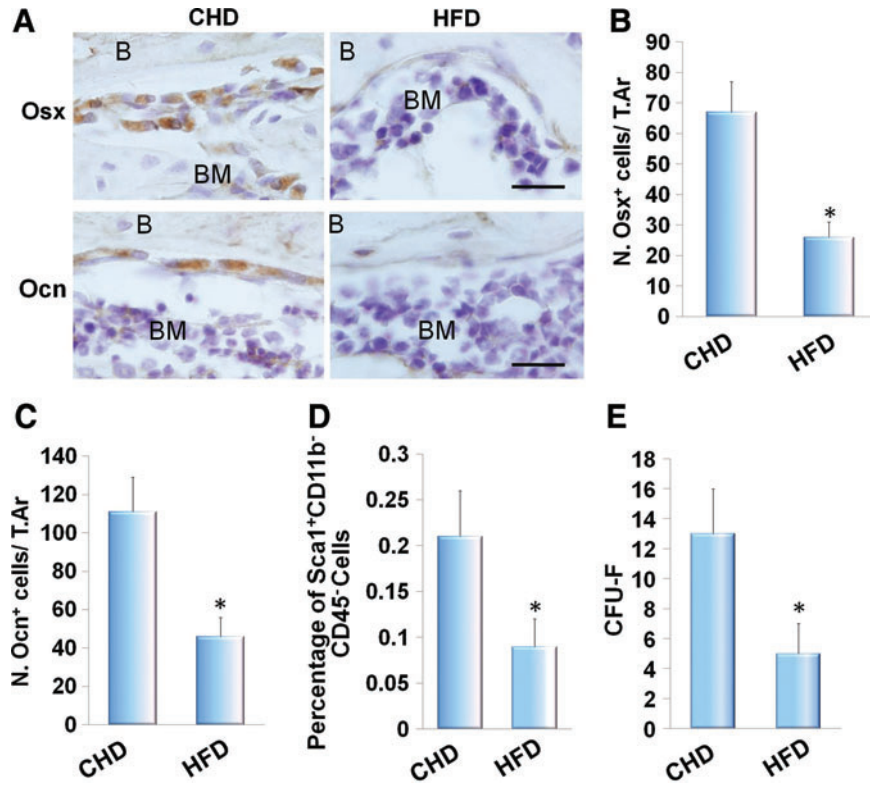

**SUPPLEMENTARY FIG. S1.** Reduced mesenchymal stem cells and osteoblastogenesis in the skeleton of *ldlr*<sup>-/-</sup> mice fed HFDs. (A) Representative immunohistochemical staining of osterix (Osx) and osteocalcin (Ocn) in femur sections of *ldlr*<sup>-/-</sup> mice fed CHD or HFD for 12 weeks. B, bone; BM, bone marrow. Number of Osx-positive cells per mm<sup>2</sup> tissue area (N.Osx<sup>+</sup> cells/T.Ar) (B) and number of Ocn-positive cells per mm<sup>2</sup> tissue area (N.Ocn<sup>+</sup> cells/T.Ar) (C). *n*=5, \**P*<0.001 versus CHD group. (D) Flow cytometry measured percentages of Sca1<sup>+</sup>CD29<sup>+</sup>CD11b<sup>-</sup>CD45<sup>-</sup> cells in bone marrow of *ldlr*<sup>-/-</sup> mice fed CHD or HFD for 12 weeks. *n*=5, \**P*<0.01 versus CHD group. (E) Colonies formed from harvested bone marrow of left tibia of the *ldlr*<sup>-/-</sup> mice fed CHD or HFD for 12 weeks in colony forming unit-fibroblast assay. *n*=5, \**P*<0.001 versus CHD group. CHD, chew diet; HFD, high-fat western diets.
